# Supplementary material for: Human symptoms–disease network
Source: Springer Nature journal article supplement (doi:10.1038/ncomms5212), 2014-06-26
Supplement: ncomms5212-s1.pdf [file ncomms5212-s1.pdf]

Human symptoms–disease network | Nature Communications


Skip to main content

Thank you for visiting nature.com. You are using a browser version with limited support for CSS. To obtain
the best experience, we recommend you use a more up to date browser (or turn off compatibility mode in
Internet Explorer). In the meantime, to ensure continued support, we are displaying the site without styles
and JavaScript.

Advertisement

- View all journals
- Search
- Log in

- Explore content
- About the journal
- Publish with us

- Sign up for alerts
- RSS feed


1. nature
2. nature communications
3. articles
4. article

Human symptoms–disease network

Download PDF

- Article
- Published: 26 June 2014

# Human symptoms–disease network

- XueZhong Zhou1,2,3na1,
- Jörg Menche2,3,4na1,
- Albert-László Barabási2,3,4,5,6 &
- …
- Amitabh Sharma2,3,6

Show authors

*Nature Communications*
**volume 5**, Article number: 4212 (2014)
Cite this article

- 58k Accesses
- 435 Citations
- 48 Altmetric
- Metrics details

### Subjects

- Medical research
- Networks and systems biology
- Signs and symptoms

## Abstract

In the post-genomic era, the elucidation of the relationship between the molecular origins of diseases and their resulting phenotypes is a crucial task for medical research. Here, we use a large-scale biomedical literature database to construct a symptom-based human disease network and investigate the connection between clinical manifestations of diseases and their underlying molecular interactions. We find that the symptom-based similarity of two diseases correlates strongly with the number of shared genetic associations and the extent to which their associated proteins interact. Moreover, the diversity of the clinical manifestations of a disease can be related to the connectivity patterns of the underlying protein interaction network. The comprehensive, high-quality map of disease–symptom relations can further be used as a resource helping to address important questions in the field of systems medicine, for example, the identification of unexpected associations between diseases, disease etiology research or drug design.

You have full access to this article via your institution.

Download PDF

Download PDF

### Similar content being viewed by others

### Diversity and molecular network patterns of symptom phenotypes

Article
Open access
30 November 2021

### Visualizing novel connections and genetic similarities across diseases using a network-medicine based approach

Article
Open access
01 September 2022

### A data driven approach reveals disease similarity on a molecular level

Article
Open access
25 October 2019

## Introduction

The past decades have brought remarkable advances in our understanding of human disease1. While progress on the genetic and proteomic aspects has been impressive2, most aspects of the relation between genotype and phenotype still remain unclear, especially for complex diseases1. Heterogeneity, polygenicity and pleiotropism are major factors that are hampering the progress3,4, as well as diffuse boundaries between diseases5, as they can have multiple causes and be related through several dimensions6,7,8,9,10,11,12,13. A number of resources have been constructed aiming to understand the entangled relationship between diseases, often in the form of networks6. For example, Rzhetsky *et al.*12 inferred the comorbidity links between 161 disorders from the disease history of 1.5 million patients and proposed models to estimate the genetic overlap between diseases. Hidalgo *et al.*9 constructed a disease phenotypic network using comorbidity patterns from more than 30 million Medicare patients, capturing disease progression patterns, such as that patients tend to develop diseases in the network vicinity of diseases that they already have and that patients with highly interconnected diseases show higher mortality. In model organisms, for example, physical protein interactions point to genes that are related to similar phenotypes when knocked out14,15,16,17. Furthermore, a number of studies indicated that similarity between phenotypes reflects biological modules of interacting functionally related genes. Likewise, phenotypic similarities between monogenic syndromes in human have been shown to reflect shared biological mechanisms and can be exploited to predict gene function18,19,20. Interestingly, the inclusion of disease phenotype similarities can substantially improve the performance of candidate gene prediction methods21,22,23,24. Resources like the Human Phenotype Ontology25 (HPO) and the Mammalian Phenotype Ontology26 provide a standardized vocabulary of phenotypic information that can also be used to transfer detailed knowledge of model organisms to interpret and predict associated phenomena in human27,28.

An important available resource that has been overlooked so far is the highest level clinical phenotypes, that is, symptoms and signs (called symptoms in brief in the following). Symptoms are crucial in clinical diagnosis and treatment. For example, the major symptoms of a heart attack are pain or discomfort in the chest, arms or shoulder, jaw, neck, or back, feeling weak, light-headed or faint and shortness of breath29. The wide range of symptoms illustrates the interdependence of the homeostatic mechanisms, whose perturbations lead to the manifestation of a disease. Community health professionals and general practitioners derive most of their knowledge of the symptoms of individual diseases from hospital-based observation30. Indeed, symptoms are the most directly observable characteristics of a disease and the very basis of clinical disease classification. The elucidation of the connection between shared symptoms and shared genes or protein–protein interactions of two diseases could therefore help bridge the gap between bench-based biological discovery and bedside clinical solutions.

In this paper, we use large-scale medical bibliographic records and the related Medical Subject Headings (MeSH) metadata31 from PubMed32, to generate a symptom-based network of human diseases (Human Symptoms Disease Network, HSDN), where the link weight between two diseases quantifies the similarity of their respective symptoms. By integrating disease–gene association and protein–protein interaction (PPI) data, we investigate the correlations between the symptom similarity of diseases and their degree of shared genes or PPIs (Fig. 1 and Supplementary Fig. 1).

**Figure 1: Construction of the HSDN.**

(**a**) Extracting the disease–symptom relationships from PubMed bibliographic literature database. The association between symptoms and diseases are based on their co-occurrence in the MeSH metadata fields of PubMed. (**b**) A disease network is constructed, in which nodes represent diseases and links represent symptom similarities between diseases. (**c**) Integrating both disease–gene associations and PPI databases to obtain shared genes/PPIs between diseases. We consider shared PPIs of 1st order (directly connected proteins) and of 2nd order (proteins are connected by a path of length two). (**d**) Resulting disease network in which links represent shared genes/PPIs. (**e**) The backbone of the HSDN with shared genes/PPIs. We observe highly clustered regions of diseases that belong to the same broad disease category.

Full size image

## Results

### Construction of the HSDN

We extracted 7,109,429 (about 35.5% in over twenty million records) PubMed bibliographic records with one or more disease/symptom terms in the MeSH metadata field (see Methods), yielding a total of 4,442 disease terms and 322 symptom terms (Supplementary Data 1 and 2). After filtering for the co-occurrence of at least one disease and one symptom term, 849,103 (4.2%) PubMed records were left. From these records, we extracted the symptom–disease relationships, resulting in 147,978 connections between 322 symptoms and 4,219 diseases (Fig. 2, Supplementary Data 3), which represent 98.5% of all symptoms and 95.0% of all diseases contained in the MeSH vocabulary. To quantify the relation between a symptom and a disease, we then used the term frequency-inverse document frequency (see Methods). After measuring the symptom similarities for all disease pairs, we obtained the HSDN with 7,488,851 links with positive similarity between 4,219 diseases. The HSDN covers all MeSH disease categories, from broad categories like cancer to specific conditions like cerebral cavernous hemangioma. The twenty most frequent diseases and symptoms are depicted in Fig. 2a,b. The two most frequent diseases in the PubMed database are breast cancer and hypertension. Note that this reflects the cumulative focus of research in the biomedical field rather than the epidemical prevalence of diseases. The HSDN constitutes a single giant component, that is, all diseases directly or indirectly connect to all others. The network is very dense, with 94% of the nodes being connected to more than 50% of all other nodes (Fig. 2d). The most highly connected disease is Hyponatremia (4,214 disease neighbours), an electrolyte disorder associated with a number of common symptoms that occur in many diseases, such as headache, nausea and fatigue. The disease with the fewest connections is Odontoma (eight disease neighbours), a tumour originating from teeth.

**Figure 2: Basic statistics of the HSDN.**

(**a**) The twenty most frequent disease terms in the MeSH fields of PubMed records, containing eight types of cancers (for example, breast neoplasms, lung neoplasms), four types of vascular diseases (for example, hypertension, myocardial infarction and coronary diseases), HIV infections, asthma, obesity, pain, rheumatoid arthritis, type 2 diabetes and two mental diseases. Breast neoplasms have more than 120,000 PubMed occurrences. (**b**) The top twenty symptom terms include five body weight–related symptom terms. Note that in MeSH, pain is also considered as a symptom, occurring more than 100,000 times in the PubMed database. (**c**) Symptom and disease co-occurrence distribution. (**d**) Distribution for the number of connections (degrees) of nodes in the HSDN.

Full size image

### Performance evaluation of the HSDN

In order to validate our approach, we did an extensive manual quality check of the core data. We randomly selected 1,000 PubMed records and manually evaluated the extracted symptom–disease relations with the aid of medical experts (see Supplementary Methods, Supplementary Data 5). We find that (i) the vast majority of the relations are medically meaningful and direct. The only notable (5.5% of the random records) confounding factors were symptoms related to drug treatment instead of the immediate disease. (ii) The disease relations in the HSDN are very specific, 57% of the random records contain only a single disease, 28.5% contain two and only 14.5% more than two. (iii) The automated process yields very few false positives: only 0.8% of the cases contained a negation as in ‘disease X is NOT related to symptom Y’ that our text mining approach could not capture.

To further test the reliability of the obtained disease similarity score, we create a benchmark disease network using the manually curated HPO25 data (Supplementary Methods), in which two diseases are connected if they share at least one symptom. The benchmark network includes 940 MeSH diseases (corresponding to 2,111 OMIM disease identifiers) and 121,945 links. It is much smaller than the HSDN, but arguably of high quality. Comparing the HSDN with the HPO network, we find that higher symptom similarity in the HSDN is related to higher edge overlap with the HPO network (Fig. 3a). The Pearson correlation coefficient (PCC) between the ratio of shared disease links and disease similarity is very high (PCC=0.96, *P*=1.4 × 10−5), indicating that the proposed disease similarity is a reliable measure for shared symptoms. For comparison with random expectation, we reshuffled (10 random permutations) the symptom features of each disease using the Fisher–Yates method33, finding significantly less overlap and fewer high similarity values (Fig. 3b). In randomized networks, most disease similarities are low (<0.1), and their distribution is significantly different from the one in the real HSDN, where the count of disease links declines much more slowly with increasing disease similarity. To further examine the completeness of the HSDN, we calculate the number of the common nodes and links with the HPO disease network (Fig. 3c). The results show that the benchmark network from HPO is almost a complete subset of the HSDN, which captures 898 of its nodes (95.5%) and 107,098 of its links (87.8% of the whole HPO network, 95.7% of the subnetwork of the 898 common nodes). The number of overlapping links is significantly higher (*P*=2.2 × 10−16, binomial test, see Supplementary Methods) than random expectation, again indicating that the HSDN offers reliable relationships.

**Figure 3: Reliability evaluation of symptom similarity in the HSDN.**

(**a**) The percentage of HPO network disease links in the HSDN for different similarity bins. In the real data, stronger symptom similarity is related to higher edge overlap with the HPO network. For high similarity values, the overlap is much bigger than expected by chance as in 10 random permutation cases. (**b**) The overlapping edge count distributions for real data and random permutation. Error bars in **a** and **b** denote s.d. (**c**) Number of overlapping disease links (observed overlapping links versus random expectation).

Full size image

### Shared symptoms indicate shared genes between diseases

We integrated three genotype–phenotype databases, yielding 28,336 disease–gene associations (Supplementary Methods, Supplementary Data 6) and constructed a Human Disease Network as described in Goh *et al.*13, in which two diseases are connected if they share an associated gene. The resulting network consists of 1,741 diseases and 47,410 links. Comparing the link overlap between the HSDN and Human Disease Network, we find a total of 41,880 overlapping links (20,182 overlapping disease links with similarity score ≥0.2, a 1.8-fold increase compared with random expectation, *P*=2.2 × 10−16, binomial test; Fig. 4b). The overlapping link ratio (fraction of disease pairs with both shared symptoms and shared genes of all disease pairs with shared symptoms) shows strong positive correlation with disease similarity (PCC=0.92 and *P*=1.8 × 10−4; Fig. 4a), that is, diseases with more similar symptoms are more likely to have common gene associations. Disease pairs with well-established similar clinical manifestations and known common genes include, for example, hypoalphalipoproteinemia and metabolic syndrome (similarity score 0.97), insulin resistance and metabolic syndrome (0.99), insulin resistance and diabetes mellitus (0.97), fatty liver and diabetes mellitus (0.93) and duodenal ulcer and stomach ulcer (0.93). High similarity scores can also suggest yet unknown common genetic associations. For example, a recent study34 established similar patterns of genomic alteration in the two cancer types colonic neoplasm and rectal neoplasm. In the HSDN, they also have very similar clinical manifestations (similarity score 0.64), even higher values are obtained between the related terms rectal neoplasms and colorectal neoplasms (0.92) or colonic neoplasms and colorectal neoplasms (0.73).

**Figure 4: Correlation between symptom similarity and shared genes.**

(**a**) The link overlap between the disease network based on shared symptoms and the disease network based on shared genes. Random expectation is derived from 10 random permutations, error bars denote s.d. (**b**) The observed overlap (blue arrow) and the distribution of the expected overlap for the random control for two cases of (i) all disease links with positive symptom similarity and (ii) disease links with symptom similarity bins ≥0.2 (inset). In both cases the overlap is statistically highly significant (*P*=2.2 × 10−16, binomial test).

Full size image

### Shared symptoms indicate shared protein interactions

To further assess whether shared symptoms indicate not only shared genetic associations, but also close interaction of the corresponding proteins, we integrated five publicly available PPI databases (Supplementary Methods) and constructed disease networks in which two diseases are linked if they have shared 1st and 2nd order PPI interactions, respectively: shared 1st order PPI means that two diseases have associated proteins that directly interact within the PPI network, while shared 2nd order PPI means that they are connected by a path of length two (Fig. 1c,d). In both cases, we find strong positive correlations between symptom similarity and shared PPIs. The ratio of diseases with shared PPIs increases significantly with higher symptom similarity (PCC=0.89, *P*=5.4 × 10−4 for 1st order interactions, Fig. 5a; PCC=0.84, *P*=0.002 for 2nd order interactions, Fig. 5b). It is well established that proteins associated to the same human disease/disease category or phenotype tend to interact with each other13,20,35. In contrast to previous phenotype maps19, the HSDN strictly considers only symptom features (excluding in particular disease terms themselves, anatomical features, congenital abnormalities, and so on) and is not focused on monogenic diseases, but includes all disease categories. Our results therefore provide robust evidence that interacting proteins between diseases are also connected to similar high-level manifestations.

**Figure 5: Correlation between symptom similarity and shared PPIs.**

Percentage of overlapping disease links between the network of shared symptoms and the network of shared 1st order PPIs (**a**) and shared 2nd order PPIs (**b**). Random expectations are derived from 10 random permutations, error bars denote s.d.

Full size image

This broader scope enables us to extend previous approaches to uncover novel disease associations. For example, it is considered that both genetic and environmental factors play a role in the pathogenesis of Parkinson’s disease (PD)36, which is characterized by resting tremor, akinesia and rigidity. In the HSDN, we found that PD has highly similar symptoms with substance-related diseases like mercury poisoning (0.60), MPTP (1-methyl-4-phenyl-1,2,3,6-tetrahydropyridine, a toxin) poisoning (0.58) and manganese poisoning (0.52). MPTP is an established disease model for PD37, and manganese poisoning has also been proposed recently38. Similarly, it has been suggested that the molecular response to mercury exposure may increase dopamine neuron vulnerability and the propensity to develop PD39.

The results above indicate that high symptom similarity strongly correlates with shared genes, as well as with 1st- and 2nd-order protein interactions. This suggests that there is a general relationship between phenotypic similarity on one hand, and path lengths on the PPI network on the other hand. To test this hypothesis, we calculate the minimum shortest path length (MSPL) of proteins within the PPI network for each disease pair (see Methods). Indeed, we find strong negative correlation between the MSPL and symptom similarities (PCC=−0.93 and *P*=7.7 × 10−5; Fig. 6a,b), that is, the higher the symptom similarity, the shorter the PPI network distance between diseases. The MSPL decreases from 2.88 to 1.98 when disease similarity bins increase from 0.1 to 1.0. This indicates that the network parsimony principle6 according to which causal molecular pathways tend to coincide with shortest network paths can be used to quantify the correlation between manifestations of diseases and their related protein interactions.

**Figure 6: Correlation between symptom similarity and shortest path length of the associated proteins in the PPI network.**

(**a**) MSPL between disease modules. (**b**) MSPL distributions for different disease similarities.

Full size image

### Diversity of disease manifestations and molecular mechanisms

In genetic nosology, it has been recognized that due to pleiotropism and genetic heterogeneity there is a large discrepancy between the diversity of their clinical manifestations and the underlying cellular mechanisms4. For example, sickle cell disease has rather diverse clinical manifestations, such as mild anaemia, painful crises, bony infarcts and acute chest syndrome, despite being a classical monogenic disease. Familial hypertrophic cardiomyopathy on the other hand, is caused by mutations of a number of different genes, yet its pathophysiology largely manifests itself in a specific portion of the heart muscle (which in turn may lead to several clinical phenotypes). To fully unravel these complex relations, comprehensive and complete maps are needed that combine genome or proteome components with intermediate phenotype components, environmental factors and pathophenotypes5.

In a first attempt to analyse the relation between molecular and phenotypic diversity of diseases, we construct an integrated disease network that combines phenotypic relations based on symptom similarity, with shared molecular mechanisms based on protein interactions: First, we filter the HSDN for significant links with similarity scores >0.1 (1,121,899 links remain). Second, we identify all disease links that are supported by either shared genes, or 1st/2nd order protein interactions. The resulting shared symptoms and shared genes/PPIs network (SGPDN) contains 133,106 interactions between 1,596 distinct diseases (Supplementary Data 4). We used two quantities to measure disease diversity in this network: betweenness and node diversity (see Methods). In the HSDN, we assume that a disease has a high capability to accommodate different manifestations when it has a high network betweenness, that is, a high number of shortest paths pass through it. We calculated the disease diversity in the SGPDN and the corresponding maximum diversities of disease-related genes in the PPI network, finding strong positive correlations between the two (node diversity correlation: PCC=0.84, *P*=2.5 × 10−10, Fig. 7a; betweenness correlation: PCC=0.59, *P*=9.5 × 10−7, Fig. 7b). These results demonstrate that a disease with diverse clinical manifestations will typically also have more diverse underlying cellular network mechanisms.

**Figure 7: Disease node diversity and betweenness.**

Disease node diversity (**a**) and betweenness (**b**) in the disease network compared to the node diversity/betweenness of the related genes within the PPI network. The values of node diversity/betweenness are normalized by *z*-score. The red points in **b** represent data points that have been removed in order to test for the sensitivity of our results towards possible outliers. The results remained the same. Error bars denote s.d. of the data in the respective bins.

Full size image

### Disease groups

The HSDN approach can further be used to study interrelationships between groups or classes of diseases. In order to obtain a more global view, we extracted the backbone of the SGPDN disease network using the multi-scale backbone algorithm40 (Supplementary Methods). The resulting subnetwork includes 2,159 disease links with significant associations of shared symptoms, shared genes and (1st or 2nd order) PPIs (Fig. 1e and Supplementary Fig. 2). We find that diseases within the same category form clear, highly interconnected communities, such as metabolic diseases, respiratory tract diseases, digestive system diseases, cardiovascular diseases, neoplasms and mental disorders. Exceptions include bacterial infectious diseases, virus diseases and parasite diseases, which appear to be spread among other disease categories. Besides the links within the same category, there are also many links connecting diseases of different categories, for example, between neoplasms and other disease categories. In particular, we find that the three main disease risks, namely infectious diseases, chronic inflammation diseases and neoplasms, are highly interconnected. A detailed analysis of these connections may yield novel insights into the more and more widely recognized pathological and aetiological associations between inflammatory diseases and neoplasms41 and the human genetic susceptibility to infectious diseases42.

## Discussion

Despite the known limitations in completeness and quality of currently available data on clinical manifestations and cellular mechanisms of disease, our results indicate strong associations between symptom similarity of diseases and shared genes and PPIs, as well as a clear correspondence between the diversity of the clinical manifestations of diseases and the underlying diversity in their cellular mechanisms. This demonstrates that individual-level disease phenotypes (for example, symptoms) and molecular-level disease components (for example, genes and PPIs) show robust correlations, even though their direct associations are influenced by complicated intermediate factors43. This finding opens up promising venues to use the presented symptom-based network as a rich resource to quantitatively address diverse questions in the field of systems medicine.

The observed correlations between clinical manifestations and molecular mechanisms of diseases can be highly valuable for functional annotations of genomics11 and reveal regularities between different disease categories. Inflammatory bowel diseases (IBD), for example, are a group of diseases of increasing global prominence, generally described by chronic relapsing inflammatory conditions of the gastrointestinal tract. There are two major types, ulcerative colitis (UC) and Crohn’s disease (CD)44. Despite their very different pathological characteristics, they may present with common symptoms like abdominal pain, vomiting, diarrhoea*, rectal bleeding* and weight loss. In total, UC and CD share 78 symptoms in the HSDN (similarity score ~0.89). In agreement with the clinical recognition of UC and CD, eight out of their respective 10 symptoms with the highest bibliographic co-occurrence are in common (Table 1). Also at the molecular level many shared genetic risk loci/genes have been identified, for example, *IL23R*, *JAK2*, *IL12B*, *STAT3*, *PTPN2*, *TNFSF15* and *CARD9*45. A recent research found 71 new genome-wide significant associations for a total of 163 IBD loci, most of which contribute to both UC and CD phenotypes46. We have further investigated the correlation between IBD and all the 27 disease categories in MeSH (Supplementary Methods and Supplementary Table 1). In addition to the expected relation to other digestive system diseases, we found positive correlations with bacterial infections, virus diseases, parasitic diseases and immune system diseases (Supplementary Fig.7, Supplementary Tables 2 and 3). This finding is also coherent with genome-wide association study results46, showing that genetic loci identified for IBD have a strong overlap with genes tied to the immune response to mycobacterial infections and to other immune-related disorders such as ankylosing spondylitis and psoriasis.

**Table 1 The ten symptoms with the highest co-occurrence with Crohn’s disease and ulcerative colitis.**

Full size table

A second promising example for the use of our broad data across disease categories is a comparison between genetic and infectious diseases. By analysing integrated data (virus targets, related PPIs and disease–gene associations) of the Epstein–Barr virus (EBV) and the human papillomavirus, a recent study47 showed that these viruses perturb the host network in a highly localized fashion, indicating that primarily the proteins directly connected to viral targets play a mechanistic role in the implicated diseases. We examined the HSDN network for diseases with similar symptoms as EBV infections. The 20 most strongly associated diseases include several EBV-implicated diseases, such as infectious mononucleosis (similarity score 0.63), T-cell lymphoma (0.59), Hodgkin disease (0.59), diffuse large B-cell lymphoma (0.58) and non-Hodgkin lymphoma (0.58). These examples show that diseases associated with genes located in the close neighbourhood of EBV targets in the PPI network also exhibit high symptom similarity with EBV infections. Symptom similarity scores could therefore provide a promising venue for gene prioritization and target identification of viral/bacterial infections.

Another important area in which symptoms play a crucial role is drug-related research. Most drugs approved by the US Food and Drug Administration are merely palliative48, that is, they only treat symptoms rather than targeting disease-specific genes or pathways. A detailed understanding of how symptoms relate to underlying molecular processes is therefore central for our efforts towards more effective and individualized treatments. First attempts in this direction have been proposed recently in drug design, using for example phenotype screening or the similarities of side-effects49, which are also most often observed and reported as clinical symptoms50. Our comprehensive symptom-based disease relationships may provide valuable input for such approaches. For example, the similar treatment of the two diseases with high symptom similarity discussed above, UC and CD, is well established in clinical practice. In both cases, steroids are used to relieve symptoms, as well as common drugs, for example, azathioprine, infliximab and olsalazine. We speculate that the HSDN could help in systematically generating hypotheses for such disease pairs. Alzheimer’s disease (AD), for example, is still lacking an effective therapy to reverse the progressive loss of memory and other cognitive functions. In the HSDN, AD shows high symptom similarity with epilepsy and several of its variants, like temporal lobe epilepsy (0.63). The two diseases also exhibit significant comorbidity51. An antiepileptic drug (levetiracetam) was recently found to reverse deficits in learning and memory in AD mice and might also help ameliorate related abnormalities in human52.

Symptoms represent the high-level manifestations of a disease that are actually observed by patients and physicians. Ultimately, it is due to certain symptoms that an individual will seek professional help, and they are crucial for accurate clinical diagnosis and designing the appropriate treatment. However, the objective validation of the patients’ experience of major classes of symptoms still remains a pressing challenge in clinical practice. Currently, the MeSH metadata do not include more accurate, quantitative descriptions of symptom features (for example, severity, frequency or prevalence rate). Promising routes to further increase the accuracy of symptom-based disease relations would therefore be the integration of medical terminologies and clinical data. Clinical terminology systems like SNOMED-CT53 hold millions of relationships between medical entities (for example, diseases, body locations and clinical findings), yet currently they only contain relatively few symptom–disease associations as considered in this study (Supplementary Methods). A second source containing vast amounts of relevant information are electronic health records and their related personal laboratory results. These data probably constitute the richest and most promising resource towards a quantitative, personalized description of symptom–disease relationships. To this date, however, clinical documentation is still highly variable and rife with errors and imprecision54,55. Symptoms are typically described in narrative notes, therefore requiring complex full-text analysis. In addition, a large-scale data integration aiming at comprehensive disease and population coverage will also meet difficulties pertaining to privacy issues and semantic interoperability across institutions or countries56. Notwithstanding these challenges, we are convinced that advances in the field of automated text mining57 will eventually enable us to substantially expand the data presented in this manuscript.

## Methods

### Basic datasets

The construction of a symptom-based disease network requires (i) a basic taxonomy for diseases and symptoms and (ii) a corpus of data from which to extract their relations. After evaluating several possible options (see Supplementary Methods, Supplementary Data 6 and 7 for a comparison with SNOMED-CT, ICD9/10 and HPO), we chose the combination of the MeSH vocabulary and the PubMed literature database. The MeSH classification is defined by experts and offers a comprehensive vocabulary across all disease categories (in contrast to, for example, OMIM which focuses on monogenic diseases), systematically organized in a hierarchical tree (in contrast to, for example, ICD9/10 which has only two levels). The most important advantage for our purposes is that MeSH is used directly to index all articles in the massive PubMed database. The indexing is done manually by trained experts and according to standardized procedures, thereby ensuring highly accurate assignments58. In addition, this process alleviates a core challenge in medical text mining, the ambiguity and multiple conventions in nomenclature, since the MeSH nomenclature includes synonymous aliases for any given term.

The basic data used in our study also bears certain limitations. The MeSH vocabulary is relatively old and rigid with only annual updates. This may limit the extent to which the identified associations capture latest research results of the rapidly evolving field of medicine. On the other hand, stable and well-established terms may also lead to more robust associations for our purposes. Other important shortcomings are that MeSH has relatively few disease terms (compared with, for example, ICD9/10) and that our associations are not derived directly from clinical diagnosis, but from research articles. In the future, it would be highly desirable to develop techniques that enable us to automatically extract information from clinical records. Currently available methods for this very challenging problem of automated full-text analysis in large-scale data do not yield results with comparable accuracy55. A challenge inherent to all disease taxonomies is that the distinction between symptoms and diseases is not always clear, for example obesity. According to the expert-based MeSH classification, obesity belongs to four different broad categories, namely ‘Nutritional and Metabolic Diseases’, ‘Diagnosis’, ‘Physiological Phenomena’ and ‘Pathological Conditions, Signs and Symptoms’. Considering its MeSH definition as ‘a status with body weight that is grossly above the acceptable or desirable weight, usually due to accumulation of excess fats in the body [...]’ it is apparent that a precise and unique classification into a single category is difficult and obesity may indeed be regarded as a disease, a symptom, a diagnosis and physiological phenomenon at the same time. Since the multihierarchical structure of MeSH explicitly allows for multiple categories for a single term, the data we generated can be used to explore both interpretations, for example, the relationships of obesity as a symptom or as a disease.

### Acquisition of symptom and disease relationships

Each article listed in PubMed is associated to metadata that include a list of manually assigned keywords describing the major topics of the article. We developed a Java programme (Supplementary Fig. 4) utilizing the NCBI E-utility web services to acquire all PubMed identifiers whose keywords include any of the disease or symptom terms defined by MeSH (2011 ASCII version, see Supplementary Methods). Note that we do not use a full-text search of the articles or their abstracts, but only the manually curated metadata. The association between symptoms and diseases were then quantified using term co-occurrence (number of PubMed identifiers in which two terms appear together; see Supplementary Methods and Supplementary Fig. 5). Similar methods have been widely used as a reliable approach to identify associations between different medical entities59. Note that this pairwise term co-occurrence does not take possible interactions between symptoms into account, but considers different symptoms of a given disease to be independent of each other. Prevalent combinations of symptoms can be extracted from the weighted symptom vectors described below. However, these combinations only account for positive interactions between symptoms. Cases, in which certain symptoms of the same disease are mutually exclusive, cannot be detected with this simple method.

### Symptom-based diseases similarity

In the field of information retrieval, text documents or concepts are commonly represented by feature vectors60. Here, we describe every disease *j* by a vector of symptoms ***d******j***

where *w**i,j* quantifies the strength of the association between symptom *i* and disease *j*. The prevalence of the different symptoms and diseases is very different, for example, there are highly abundant symptoms like pain, and publication biases towards certain diseases like breast cancer. To account for this heterogeneity, we therefore do not use the absolute co-occurrence *W**i,j* to measure the strength of an association between symptom *i* and disease *j,* but the term frequency-inverse document frequency60 *w**i,j*:

where *N* denotes the number of all diseases in the dataset and *n**i* the number of diseases where symptom *i* appears. Since all symptoms in our data have at least one associated disease, the potential problem of dividing by zero does not arise.

A widely used measure in both text mining and the biomedical literature to quantify the similarity between two concepts is the cosine similarity of the respective vectors. The similarity between the vectors *d**x* and *d**y* of two diseases *x* and *y* is calculated as follows:

The cosine similarity ranges from 0 (no shared symptoms) to 1 (identical symptoms).

### Filtering significant symptom–disease associations

The full HSDN is very dense with over 84% of all possible pairwise disease links being present. In addition to the absolute value of a pairwise symptom similarity, we therefore also determined its statistical significance, for instance for a more accurate inference of phenotype–genotype associations. A widely used statistic to filter significant associations between medical entities from co-occurrence literature data is the *χ*2-test that compares observed frequencies with the frequencies expected for independence. *A priori* we do not know how many true associations to expect, even though it is reasonable to assume that many co-occurrences are indeed meaningful, given the manual curation process of the MeSH metadata. In order to rationalize the choice of a significance threshold, we use a method specifically developed for a similar application61 that combines *χ*2-tests with *P*-value plots62 (see Supplementary Methods and Supplementary Fig. 3 for more details). Comparable to previously reported values, we find a threshold of *P*-value=0.13, indicating that there are indeed relatively many false null hypothesis, that is, true associations. For our subsequent analysis, we have nevertheless chosen to proceed with the more conservative and commonly used threshold of *P*-value=0.05. We provide the full dataset in order to enable the research community to adapt these choices to their particular needs, for example to employ stricter criteria for a more targeted investigation on few diseases of interest. In our case, we obtain 62,820 filtered significant connections between 3,973 diseases and 322 symptoms. The average number of diseases per symptom is about 196, some general symptoms like abnormal body weight and pain have more than 1,000 associated diseases

### Shortest paths and single linkage between disease modules

Shortest paths are an important topological quantity for the analysis of social and biological networks63, the most prominent example of its use is probably the well-known small-world property of many complex networks64. We use Dijkstra’s algorithm65 to find all shortest paths in the PPI network. In order to quantify the PPI distance between disease pairs, we use the single linkage distance *D*SL, that is, the minimum of all shortest paths between related proteins: For two diseases *x* and *y* with the corresponding related protein sets *P**x* and *P**y*, the single linkage distance is given by

where *D(p**i**, p**j*) is the shortest path length between the two proteins *p**i* and *p**j*.

### Disease diversity

In order to characterize the connectedness of a node within a network, we use betweenness66 and node diversity67. Betweenness is a centrality measure quantifying how many shortest paths run through a given node and can be used, for example, to quantify the influence of individuals in social networks68. The diversity *φ* of node *j* is based on the node bridging coefficient69 and defined by

where *k(i)* is the degree of node *i*, *N(i)* denotes its neighbourhood, that is, the set of all its direct neighbours and δ*(i)* is the total number of links leaving that neighbourhood. The diversity *φ* is large for nodes with many neighbours that have many out-going links themselves.

For the disease diversity within the HSDN, both betweenness and node diversity can be measured directly for each disease. For the diversity of disease-related genes within the PPI, we use the maximum of all respective betweenness or node diversity values to represent the diversity of the disease in the PPI context. Furthermore, we normalized the diversity values of each disease by using the *z*-score before calculating the correlation between its two related diversity values.

## Additional information

**How to cite this article:** Zhou, X.Z. *et al.* Human symptoms-disease network. *Nat. Commun.* 5:4212 doi: 10.1038/ncomms5212 (2014).

## References

1. Botstein, D. & Risch, N. Discovering genotypes underlying human phenotypes: past successes for mendelian disease, future approaches for complex disease. *Nat. Genet.* **33**, Suppl228–237 (2003).

   Article 
   CAS 
   PubMed 
   Google Scholar
2. Vidal, M., Cusick, M. E. & Barabasi, A. L. Interactome networks and human disease. *Cell* **144**, 986–998 (2011).

   Article 
   CAS 
   PubMed 
   PubMed Central 
   Google Scholar
3. McKusick, V. A. The growth and development of human genetics as a clinical discipline. *Am. J. Hum. Genet.* **27**, 261–273 (1975).

   CAS 
   PubMed 
   PubMed Central 
   Google Scholar
4. McKusick, V. A. On lumpers and splitters, or the nosology of genetic disease. *Perspect. Biol. Med.* **12**, 298–312 (1969).

   Article 
   CAS 
   PubMed 
   Google Scholar
5. Loscalzo, J., Kohane, I. & Barabasi, A. L. Human disease classification in the postgenomic era: a complex systems approach to human pathobiology. *Mol. Syst. Biol.* **3**, 124 (2007).

   Article 
   PubMed 
   PubMed Central 
   Google Scholar
6. Barabasi, A. L., Gulbahce, N. & Loscalzo, J. Network medicine: a network-based approach to human disease. *Nat. Rev. Genet.* **12**, 56–68 (2011).

   Article 
   CAS 
   PubMed 
   PubMed Central 
   Google Scholar
7. Wang, Q. et al. Community of protein complexes impacts disease association. *Eur. J. Hum. Genet.* **20**, 1162–1167 (2012).

   Article 
   CAS 
   PubMed 
   PubMed Central 
   Google Scholar
8. Park, J., Lee, D. S., Christakis, N. A. & Barabasi, A. L. The impact of cellular networks on disease comorbidity. *Mol. Syst. Biol.* **5**, 262 (2009).

   Article 
   PubMed 
   PubMed Central 
   Google Scholar
9. Hidalgo, C. A., Blumm, N., Barabasi, A. L. & Christakis, N. A. A dynamic network approach for the study of human phenotypes. *PLoS. Comput. Biol.* **5**, e1000353 (2009).

   Article 
   PubMed 
   PubMed Central 
   Google Scholar
10. Lee, D. S. et al. The implications of human metabolic network topology for disease comorbidity. *Proc. Natl Acad. Sci. USA* **105**, 9880–9885 (2008).

    Article 
    CAS 
    ADS 
    PubMed 
    PubMed Central 
    Google Scholar
11. Brunner, H. G. & van Driel, M. A. From syndrome families to functional genomics. *Nat. Rev. Genet.* **5**, 545–551 (2004).

    Article 
    CAS 
    PubMed 
    Google Scholar
12. Rzhetsky, A., Wajngurt, D., Park, N. & Zheng, T. Probing genetic overlap among complex human phenotypes. *Proc. Natl Acad. Sci. USA* **104**, 11694–11699 (2007).

    Article 
    CAS 
    ADS 
    PubMed 
    PubMed Central 
    Google Scholar
13. Goh, K. I. et al. The human disease network. *Proc. Natl Acad. Sci. USA* **104**, 8685–8690 (2007).

    Article 
    CAS 
    ADS 
    PubMed 
    PubMed Central 
    Google Scholar
14. Giot, L. et al. A protein interaction map of *Drosophila melanogaster*. *Science* **302**, 1727–1736 (2003).

    Article 
    CAS 
    ADS 
    PubMed 
    Google Scholar
15. Li, S. et al. A map of the interactome network of the metazoan *C. elegans*. *Science* **303**, 540–543 (2004).

    Article 
    CAS 
    ADS 
    PubMed 
    PubMed Central 
    Google Scholar
16. Dudley, A. M., Janse, D. M., Tanay, A., Shamir, R. & Church, G. M. A global view of pleiotropy and phenotypically derived gene function in yeast. *Mol. Syst. Biol.* **1**, 2005 0001 (2005).

    Article 
    PubMed 
    PubMed Central 
    Google Scholar
17. Gavin, A. C. et al. Proteome survey reveals modularity of the yeast cell machinery. *Nature* **440**, 631–636 (2006).

    Article 
    CAS 
    ADS 
    PubMed 
    Google Scholar
18. Freudenberg, J. & Propping, P. A similarity-based method for genome-wide prediction of disease-relevant human genes. *Bioinformatics* **18**, (Suppl 2): S110–S115 (2002).

    Article 
    PubMed 
    Google Scholar
19. van Driel, M. A., Bruggeman, J., Vriend, G., Brunner, H. G. & Leunissen, J. A. A text-mining analysis of the human phenome. *Eur. J. Hum. Genet.* **14**, 535–542 (2006).

    Article 
    CAS 
    PubMed 
    Google Scholar
20. Gandhi, T. K. et al. Analysis of the human protein interactome and comparison with yeast, worm and fly interaction datasets. *Nat. Genet.* **38**, 285–293 (2006).

    Article 
    CAS 
    PubMed 
    Google Scholar
21. Wu, X., Jiang, R., Zhang, M. Q. & Li, S. Network-based global inference of human disease genes. *Mol. Syst. Biol.* **4**, 189 (2008).

    Article 
    PubMed 
    PubMed Central 
    Google Scholar
22. Vanunu, O., Magger, O., Ruppin, E., Shlomi, T. & Sharan, R. Associating genes and protein complexes with disease via network propagation. *PLoS. Comput. Biol.* **6**, e1000641 (2010).

    Article 
    MathSciNet 
    ADS 
    PubMed 
    PubMed Central 
    Google Scholar
23. Wang, X., Gulbahce, N. & Yu, H. Network-based methods for human disease gene prediction. *Brief. Funct. Genomics* **10**, 280–293 (2011).

    Article 
    CAS 
    PubMed 
    Google Scholar
24. Moreau, Y. & Tranchevent, L. C. Computational tools for prioritizing candidate genes: boosting disease gene discovery. *Nat. Rev. Genet.* **13**, 523–536 (2012).

    Article 
    CAS 
    PubMed 
    Google Scholar
25. Robinson, P. N. et al. The Human Phenotype Ontology: a tool for annotating and analyzing human hereditary disease. *Am. J. Hum. Genet.* **83**, 610–615 (2008).

    Article 
    CAS 
    PubMed 
    PubMed Central 
    Google Scholar
26. Smith, C. L., Goldsmith, C. A. & Eppig, J. T. The Mammalian Phenotype Ontology as a tool for annotating, analyzing and comparing phenotypic information. *Genome Biol.* **6**, R7 (2005).

    Article 
    PubMed 
    Google Scholar
27. Doelken, S. C. et al. Phenotypic overlap in the contribution of individual genes to CNV pathogenicity revealed by cross-species computational analysis of single-gene mutations in humans, mice and zebrafish. *Dis. Model. Mech.* **6**, 358–372 (2013).

    Article 
    CAS 
    PubMed 
    Google Scholar
28. Robinson, P. N. et al. Improved exome prioritization of disease genes through cross-species phenotype comparison. *Genome Res.* **24**, 340–348 (2014).

    Article 
    CAS 
    PubMed 
    PubMed Central 
    Google Scholar
29. Little, R. A. et al. Plasma catecholamines in the acute phase of the response to myocardial infarction. *Arch. Emerg. Med.* **3**, 20–27 (1986).

    Article 
    CAS 
    PubMed 
    PubMed Central 
    Google Scholar
30. Knottnerus, J. A. The effects of disease verification and referral on the relationship between symptoms and diseases. *Med. Decis. Making* **7**, 139–148 (1987).

    Article 
    CAS 
    PubMed 
    Google Scholar
31. Lowe, H. J. & Barnett, G. O. Understanding and using the medical subject headings (MeSH) vocabulary to perform literature searches. *JAMA* **271**, 1103–1108 (1994).

    Article 
    CAS 
    PubMed 
    Google Scholar
32. Wheeler, D. L. et al. Database resources of the National Center for Biotechnology Information. *Nucleic. Acids. Res.* **35**, D5–D12 (2007).

    Article 
    CAS 
    ADS 
    PubMed 
    Google Scholar
33. Fisher, R. A. S. & Yates, F. *Statistical Tables for Biological, Agricultural and Medical Research* 2nd edn revised and enlarged (Oliver & Boyd (1943).
34. The\_Cancer\_Genome\_Atlas\_Network. Comprehensive molecular characterization of human colon and rectal cancer. *Nature* **487**, 330–337 (2012).
35. Oti, M., Snel, B., Huynen, M. A. & Brunner, H. G. Predicting disease genes using protein-protein interactions. *J. Med. Genet.* **43**, 691–698 (2006).

    Article 
    CAS 
    PubMed 
    PubMed Central 
    Google Scholar
36. Warner, T. T. & Schapira, A. H. Genetic and environmental factors in the cause of Parkinson's disease. *Ann. Neurol.* **53**, (Suppl 3): S16–S23 (2003).

    Article 
    CAS 
    PubMed 
    Google Scholar
37. Duty, S. & Jenner, P. Animal models of Parkinson's disease: a source of novel treatments and clues to the cause of the disease. *Br. J. Pharmacol.* **164**, 1357–1391 (2011).

    Article 
    CAS 
    PubMed 
    PubMed Central 
    Google Scholar
38. Sanchez-Betancourt, J. et al. Manganese mixture inhalation is a reliable Parkinson disease model in rats. *Neurotoxicology* **33**, 1346–1355 (2012).

    Article 
    CAS 
    PubMed 
    Google Scholar
39. Vanduyn, N., Settivari, R., Wong, G. & Nass, R. SKN-1/Nrf2 inhibits dopamine neuron degeneration in a Caenorhabditis elegans model of methylmercury toxicity. *Toxicol. Sci.* **118**, 613–624 (2010).

    Article 
    CAS 
    PubMed 
    PubMed Central 
    Google Scholar
40. Serrano, M. A., Boguna, M. & Vespignani, A. Extracting the multiscale backbone of complex weighted networks. *Proc. Natl Acad. Sci. USA* **106**, 6483–6488 (2009).

    Article 
    CAS 
    ADS 
    PubMed 
    PubMed Central 
    Google Scholar
41. Grivennikov, S. I., Greten, F. R. & Karin, M. Immunity, inflammation, and cancer. *Cell* **140**, 883–899 (2010).

    Article 
    CAS 
    PubMed 
    PubMed Central 
    Google Scholar
42. Chapman, S. J. & Hill, A. V. Human genetic susceptibility to infectious disease. *Nat. Rev. Genet.* **13**, 175–188 (2012).

    Article 
    CAS 
    PubMed 
    Google Scholar
43. Loscalzo, J. & Barabasi, A. L. Systems biology and the future of medicine. *Wiley interdisciplinary reviews*. *Syst. Biol. Med.* **3**, 619–627 (2011).

    Google Scholar
44. Molodecky, N. A. et al. Increasing incidence and prevalence of the inflammatory bowel diseases with time, based on systematic review. *Gastroenterology* **142**, 46–54 (2012).

    Article 
    PubMed 
    Google Scholar
45. Khor, B., Gardet, A. & Xavier, R. J. Genetics and pathogenesis of inflammatory bowel disease. *Nature* **474**, 307–317 (2011).

    Article 
    CAS 
    PubMed 
    PubMed Central 
    Google Scholar
46. Jostins, L. et al. Host-microbe interactions have shaped the genetic architecture of inflammatory bowel disease. *Nature* **491**, 119–124 (2012).

    Article 
    CAS 
    PubMed 
    PubMed Central 
    Google Scholar
47. Gulbahce, N. et al. Viral perturbations of host networks reflect disease etiology. *PLoS. Comput. Biol.* **8**, e1002531 (2012).

    Article 
    CAS 
    PubMed 
    PubMed Central 
    Google Scholar
48. Yildirim, M. A., Goh, K. I., Cusick, M. E., Barabasi, A. L. & Vidal, M. Drug-target network. *Nat. Biotechnol.* **25**, 1119–1126 (2007).

    Article 
    CAS 
    PubMed 
    Google Scholar
49. Campillos, M., Kuhn, M., Gavin, A. C., Jensen, L. J. & Bork, P. Drug target identification using side-effect similarity. *Science* **321**, 263–266 (2008).

    Article 
    CAS 
    ADS 
    PubMed 
    Google Scholar
50. Kuhn, M., Campillos, M., Letunic, I., Jensen, L. J. & Bork, P. A side effect resource to capture phenotypic effects of drugs. *Mol. Syst. Biol.* **6**, 343 (2010).

    Article 
    PubMed 
    PubMed Central 
    Google Scholar
51. Imfeld, P., Bodmer, M., Schuerch, M., Jick, S. S. & Meier, C. R. Seizures in patients with Alzheimer's disease or vascular dementia: a population-based nested case-control analysis. *Epilepsia* **54**, 700–707 (2013).

    Article 
    CAS 
    PubMed 
    Google Scholar
52. Sanchez, P. E. et al. Levetiracetam suppresses neuronal network dysfunction and reverses synaptic and cognitive deficits in an Alzheimer's disease model. *Proc. Natl Acad. Sci. USA* **109**, E2895–E2903 (2012).

    Article 
    CAS 
    PubMed 
    PubMed Central 
    Google Scholar
53. Cote, R. A. & Robboy, S. Progress in medical information management. Systematized nomenclature of medicine (SNOMED). *JAMA* **243**, 756–762 (1980).

    Article 
    CAS 
    PubMed 
    Google Scholar
54. Kohane, I. S. Using electronic health records to drive discovery in disease genomics. *Nat. Rev. Genet.* **12**, 417–428 (2011).

    Article 
    CAS 
    PubMed 
    Google Scholar
55. Hripcsak, G. & Albers, D. J. Next-generation phenotyping of electronic health records. *J. Am. Med. Inform. Assoc.* **20**, 117–121 (2013).

    Article 
    PubMed 
    Google Scholar
56. Jensen, P. B., Jensen, L. J. & Brunak, S. Mining electronic health records: towards better research applications and clinical care. *Nat. Rev. Genet.* **13**, 395–405 (2012).

    Article 
    CAS 
    PubMed 
    Google Scholar
57. Pathak, J., Kho, A. N. & Denny, J. C. Electronic health records-driven phenotyping: challenges, recent advances, and perspectives. *J. Am. Med. Inform. Assoc.* **20**, e206–e211 (2013).

    Article 
    PubMed 
    PubMed Central 
    Google Scholar
58. Coletti, M. H. & Bleich, H. L. Medical subject headings used to search the biomedical literature. *J. Am. Med. Inform. Assoc.* **8**, 317–323 (2001).

    Article 
    CAS 
    PubMed 
    PubMed Central 
    Google Scholar
59. Jensen, L. J., Saric, J. & Bork, P. Literature mining for the biologist: from information retrieval to biological discovery. *Nat. Rev. Genet.* **7**, 119–129 (2006).

    Article 
    CAS 
    PubMed 
    Google Scholar
60. Salton, G., Wong, A. & Yang, C. S. A vector space model for automatic indexing. *Commun. ACM* **18**, 613–620 (1975).

    Article 
    MATH 
    Google Scholar
61. Cao, H., Hripcsak, G. & Markatou, M. A statistical methodology for analyzing co-occurrence data from a large sample. *J. Biomed. Inform.* **40**, 343–352 (2007).

    Article 
    PubMed 
    Google Scholar
62. Schweder, T. & Spjotvoll, E. Plots of p-values to evaluate many tests simultaneously. *Biometrika* **69**, 493–502 (1982).

    Article 
    Google Scholar
63. Girvan, M. & Newman, M. E. Community structure in social and biological networks. *Proc. Natl Acad. Sci. USA* **99**, 7821–7826 (2002).

    Article 
    MathSciNet 
    CAS 
    ADS 
    MATH 
    PubMed 
    PubMed Central 
    Google Scholar
64. Watts, D. J. & Strogatz, S. H. Collective dynamics of 'small-world' networks. *Nature* **393**, 440–442 (1998).

    Article 
    CAS 
    ADS 
    MATH 
    PubMed 
    Google Scholar
65. Cormen, T. H. & Cormen, T.H.I.t.a. *Introduction to Algorithms* MIT Press (2001).
66. Newman, M. E. J. *Networks: an introduction* Oxford University Press (2010).
67. Liu, Lu. et al. Mining Diversity on Networks. *Database Systems for Advanced Applications* **5981**, 384–398 (2010).

    Google Scholar
68. Freeman, L. C. A set of measures of centrality based on betweenness. *Sociometry* **40**, 35–41 (1977).

    Article 
    Google Scholar
69. Hwang, W., Kim, T., Ramanathan, M. & Zhang, A. in*Proceedings of the 14th ACM SIGKDD Internat Conf on Knowledge Discovery and Data Mining,* 336–344ACM (2008).

Download references

## Acknowledgements

We thank Baoyan Liu, Chaoming Song, Dashun Wang and Andrew Michaelson for useful discussions and suggestions, and especially Lili Xu, Guangli Song, Haixun Qi, Minghui Lv, Yiwei Wang, Xiaofeng Zhou and Hongwei Chu for the manual validation of the selected PubMed records. X.Z. was supported by the National Science Foundation of China (61105055, 81230086), National Basic Research Program of China (2014CB542903), National Key Technology R&D Program (2013BAI02B01, 2013BAI13B04), National S&T Major Special Project (2012ZX09503-001-003) and Beijing Municipal S&T Program of China (Z131110002813118). This work was supported by MapGen grant (1U01HL108630-01) and by the EC-FP7 Program, Synergy-COPD, GA no 270086. Additional support was provided by HL066289 and HL105339 grants from the U.S. National Institutes of Health.

## Author information

Author notes

1. XueZhong Zhou and Jörg Menche: These authors contributed equally to this work

### Authors and Affiliations

1. School of Computer and Information Technology and Beijing Key Lab of Traffic Data Analysis and Mining, Beijing Jiaotong University, Beijing, 100044, China

   XueZhong Zhou
2. Northeastern University Physics Department, Center for Complex Network Research, 111 DA/Physics Dept., 110 Forsyth Street, Boston, 02115, Massachusetts, USA

   XueZhong Zhou, Jörg Menche, Albert-László Barabási & Amitabh Sharma
3. Center for Cancer Systems Biology, Dana-Farber Cancer Institute, Smith Bldg., Rm. 858A, 450 Brookline Ave, Boston, 02215, Massachusetts, USA

   XueZhong Zhou, Jörg Menche, Albert-László Barabási & Amitabh Sharma
4. Department of Theoretical Physics, Budapest University of Technology and Economics, Budafoki út. 8, 1111, Budapest, Hungary

   Jörg Menche & Albert-László Barabási
5. Center for Network Science, Central European University, Nádor út. 9, Budapest, 1051, Hungary

   Albert-László Barabási
6. Channing Division of Network Medicine, Brigham and Women’s Hospital, Harvard Medical School, 181 Longwood Avenue, Boston, 02115, Massachusetts, USA

   Albert-László Barabási & Amitabh Sharma

Authors

1. XueZhong Zhou

   View author publications

   You can also search for this author in
   PubMed Google Scholar
2. Jörg Menche

   View author publications

   You can also search for this author in
   PubMed Google Scholar
3. Albert-László Barabási

   View author publications

   You can also search for this author in
   PubMed Google Scholar
4. Amitabh Sharma

   View author publications

   You can also search for this author in
   PubMed Google Scholar

### Contributions

X.Z and A.-L.B. conceived and designed the experiments; X.Z. performed the experiments; X.Z., A.S. and J.M. analysed the data; X.Z.Z., A.S., J.M. and A.-L.B.wrote the paper.

### Corresponding authors

Correspondence to
XueZhong Zhou or Amitabh Sharma.

## Ethics declarations

### Competing interests

The authors declare no competing financial interests.

## Supplementary information

### Supplementary Figures, Tables, Methods and References

Supplementary Figures 1-7, Supplementary Tables 1-3, Supplementary Methods and Supplementary References (PDF 1451 kb)

### Supplementary Data 1

List of all 4,442 diseases within PubMed and their occurrence. (TXT 113 kb)

### Supplementary Data 2

List of all 322 symptoms within PubMed and their occurrence. (TXT 6 kb)

### Supplementary Data 3

Term co-occurrences between symptoms and diseases measured by TF-IDF weighted values. This table includes 147,978 records of symptom and disease relationships. (TXT 7797 kb)

### Supplementary Data 4

List of disease links in the disease network with both significant shared symptoms and shared genes/PPIs. In total there are 133,106 such connections between 1,596 distinct diseases. (TXT 7801 kb)

### Supplementary Data 5

1,000 randomly selected PubMed bibliographic records used for manual evaluation. The records contain PubMed identifier, title, abstract, MeSH indexing, author list, journal and publication date, etc. Each record was annotated by medical experts according to three criteria: (i) The *symptom negation* column indicates whether the extracted symptom-disease relationships contain negations (1/0 for yes/no) (ii) The column *multiple diseases* indicates whether the extracted multiple diseases in PubMed records have medical meaningful relationships (0) or not (1) (iii)The possible cofounders column indicates whether intermediate or otherwise cofounding factors were found in the extracted symptom-disease relationships, such as drug effects and drug side effects. (XLS 1625 kb)

### Supplementary Data 6

This data file includes 33,977 records of the map from HPO phenotypes to UMLS semantic types (from UMLS 2012AA). (XLS 5014 kb)

### Supplementary Data 7

SNOMED-CT symptom-disease relationships. The data file has six components: disease-symptom relationships, disease list, disease terms, symptom list, symptom terms and SNOMED semantic types. There are 2,340 records of disease-symptom relationships, which include 1,623 diseases and 817 symptoms. The SNOMED semantic type component lists the semantic types of concepts and their numbers in SNOMED. (XLS 636 kb)

## Rights and permissions

Reprints and permissions

## About this article

### Cite this article

Zhou, X., Menche, J., Barabási, AL. *et al.* Human symptoms–disease network.
*Nat Commun* **5**, 4212 (2014). https://doi.org/10.1038/ncomms5212

Download citation

- Received: 07 November 2013
- Accepted: 27 May 2014
- Published: 26 June 2014
- DOI: https://doi.org/10.1038/ncomms5212

### Share this article

Anyone you share the following link with will be able to read this content:

Get shareable link

Sorry, a shareable link is not currently available for this article.

Copy to clipboard

Provided by the Springer Nature SharedIt content-sharing initiative

## This article is cited by

- ### Symptoms are known by their companies: towards association guided disease diagnosis assistant

  - Abhisek Tiwari
  - Tulika Saha
  - Sarbajeet Tiwari

  *BMC Bioinformatics* (2022)
- ### Scientific rewards for biomedical specialization are large and persistent

  - Gaétan de Rassenfosse
  - Kyle Higham
  - Orion Penner

  *BMC Biology* (2022)
- ### Mapping human disease-associated enzymes into Reactome allows characterization of disease groups and their interactions

  - Castrense Savojardo
  - Davide Baldazzi
  - Rita Casadio

  *Scientific Reports* (2022)
- ### The similarity of inherited diseases (I): clinical similarity within the phenotypic series

  - Alessio Gamba
  - Mario Salmona
  - Gianfranco Bazzoni

  *BMC Medical Genomics* (2021)
- ### Internetwork connectivity of molecular networks across species of life

  - Tarun Mahajan
  - Roy D. Dar

  *Scientific Reports* (2021)

## Comments

By submitting a comment you agree to abide by our Terms and Community Guidelines. If you find something abusive or that does not comply with our terms or guidelines please flag it as inappropriate.


You have full access to this article via your institution.

Download PDF

Download PDF

Advertisement

## Explore content

- Research articles
- Reviews & Analysis
- News & Comment
- Videos
- Collections
- Subjects

- Follow us on Facebook
- Follow us on Twitter
- Sign up for alerts
- RSS feed


## About the journal

- Aims & Scope
- Editors
- Journal Information
- Open Access Fees and Funding
- Calls for Papers
- Editorial Values Statement
- Journal Metrics
- Editors' Highlights
- Contact
- Editorial policies
- Top Articles


## Publish with us

- For authors
- For Reviewers
- Language editing services
- Submit manuscript

## Search

Search articles by subject, keyword or author

Show results from

All journals
This journal

Search

Advanced search

### Quick links

- Explore articles by subject
- Find a job
- Guide to authors
- Editorial policies

Nature Communications (*Nat Commun*)

ISSN 2041-1723 (online)

## nature.com sitemap

### About Nature Portfolio

- About us
- Press releases
- Press office
- Contact us

### Discover content

- Journals A-Z
- Articles by subject
- protocols.io
- Nature Index

### Publishing policies

- Nature portfolio policies
- Open access

### Author & Researcher services

- Reprints & permissions
- Research data
- Language editing
- Scientific editing
- Nature Masterclasses
- Research Solutions

### Libraries & institutions

- Librarian service & tools
- Librarian portal
- Open research
- Recommend to library

### Advertising & partnerships

- Advertising
- Partnerships & Services
- Media kits
- Branded
  content

### Professional development

- Nature Careers
- Nature 
  Conferences

### Regional websites

- Nature Africa
- Nature China
- Nature India
- Nature Italy
- Nature Japan
- Nature Middle East

- Privacy
  Policy
- Use
  of cookies
- Your privacy choices/Manage cookies
- Legal
  notice
- Accessibility
  statement
- Terms & Conditions
- Your US state privacy rights

© 2024 Springer Nature Limited

xml version="1.0" encoding="UTF-8"?

Close banner

Close

Sign up for the *Nature Briefing* newsletter — what matters in science, free to your inbox daily.

Email address

Sign up

I agree my information will be processed in accordance with the *Nature* and Springer Nature Limited Privacy Policy.

Close banner

Close

Get the most important science stories of the day, free in your inbox.
Sign up for Nature Briefing
